# Supplementary material for: Neutral linear amphiphilic homopolymers prepared by atom transfer radical polymerization
Source: Royal Society of Chemistry journal article supplement (doi:10.1039/c3py00916e), 2013-09-20

# Neutral Linear Amphiphilic Homopolymers Prepared by Atom Transfer Radical Polymerization

Yi Wang<sup>a</sup>, Alina O. Alb<sup>b</sup>, Jibao He<sup>c</sup>, and Scott M. Grayson<sup>a\*</sup>

<sup>a</sup> Department of Chemistry, Tulane University, 6400 Freret St., New Orleans, LA, 70118, U.S.A. Fax: 504-865-5596; Tel: 504-862-8135; E-mail: [sgrayson@tulane.edu](mailto:sgrayson@tulane.edu)

<sup>b</sup> Department of Physics, Tulane University, 6400 Freret St., New Orleans, LA, 70118, U.S.A.

<sup>c</sup> Coordinated Instrumentation Facility, 605 Lindy Boggs Building, Tulane University, 6400 Freret St., New Orleans, LA, 70118, U.S.A.

## Table of Contents

|                                                            |    |
|------------------------------------------------------------|----|
| 1) <sup>1</sup> H NMR of amphiphilic monomer <b>3</b>      | S1 |
| 2) COSY NMR of amphiphilic monomer <b>3</b>                | S2 |
| 3) <sup>13</sup> C NMR of amphiphilic monomer <b>3</b>     | S3 |
| 4) DEPT NMR of amphiphilic monomer <b>3</b>                | S4 |
| 5) <sup>1</sup> H NMR of amphiphilic homopolymer <b>4</b>  | S5 |
| 6) <sup>13</sup> C NMR of amphiphilic homopolymer <b>4</b> | S6 |

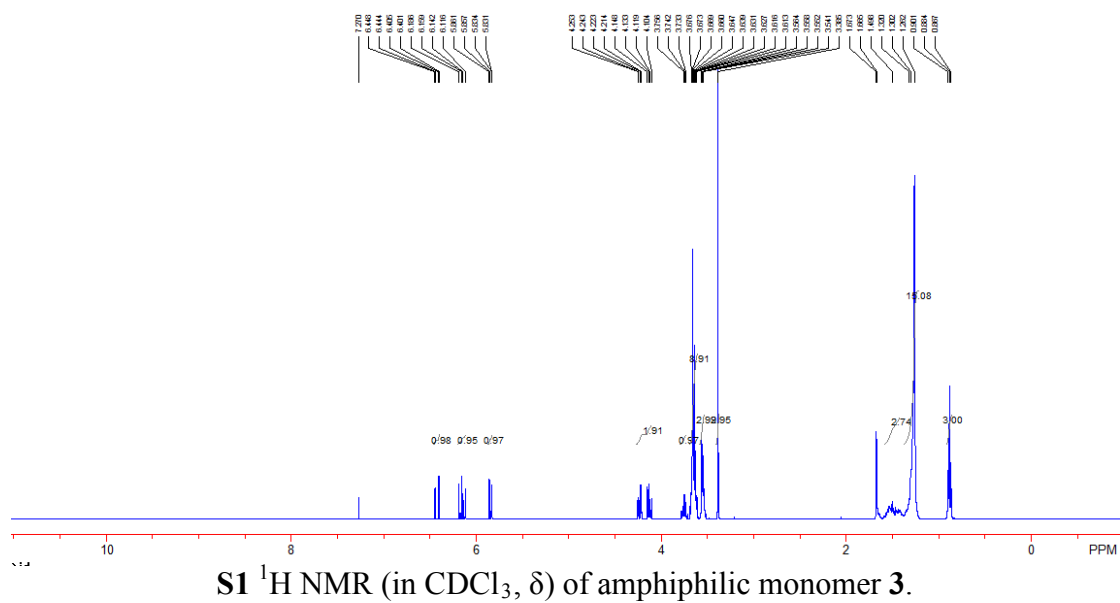

COSY NMR Spectrum of monomer in  $\text{CDCl}_3$  at RT

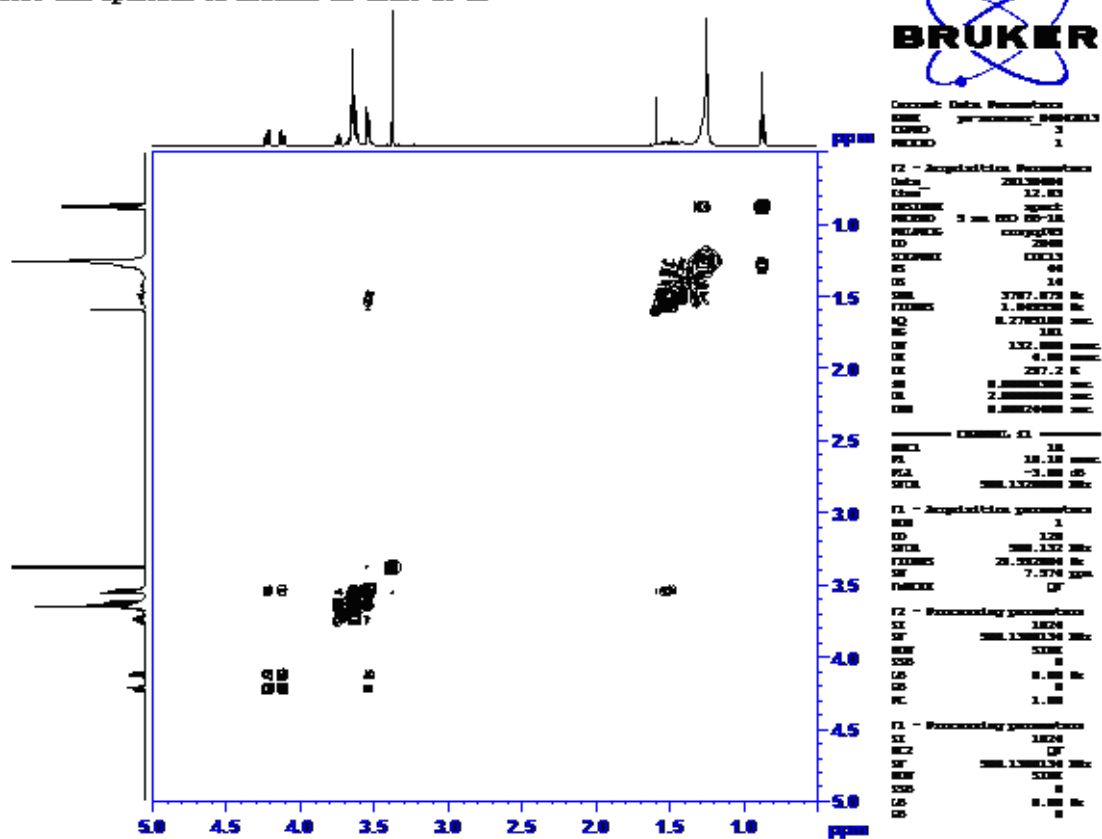

**S2** COSY NMR (in  $\text{CDCl}_3$ ,  $\delta$ ) of amphiphilic monomer **3**.

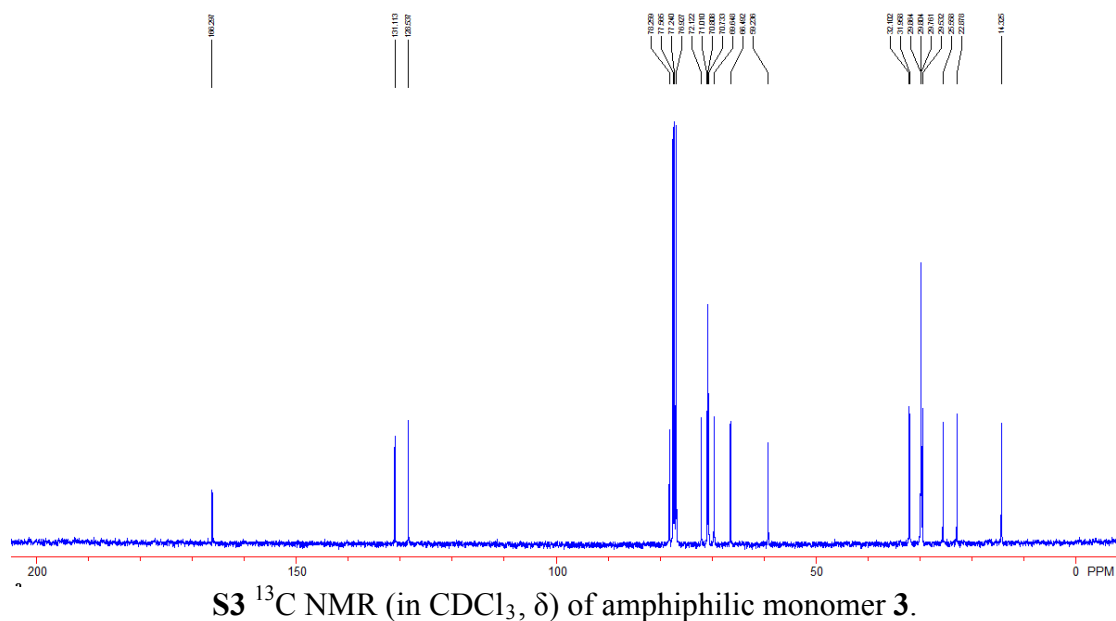

DEPT135 NMR Spectrum of monomer in  $\text{CDCl}_3$  at RT

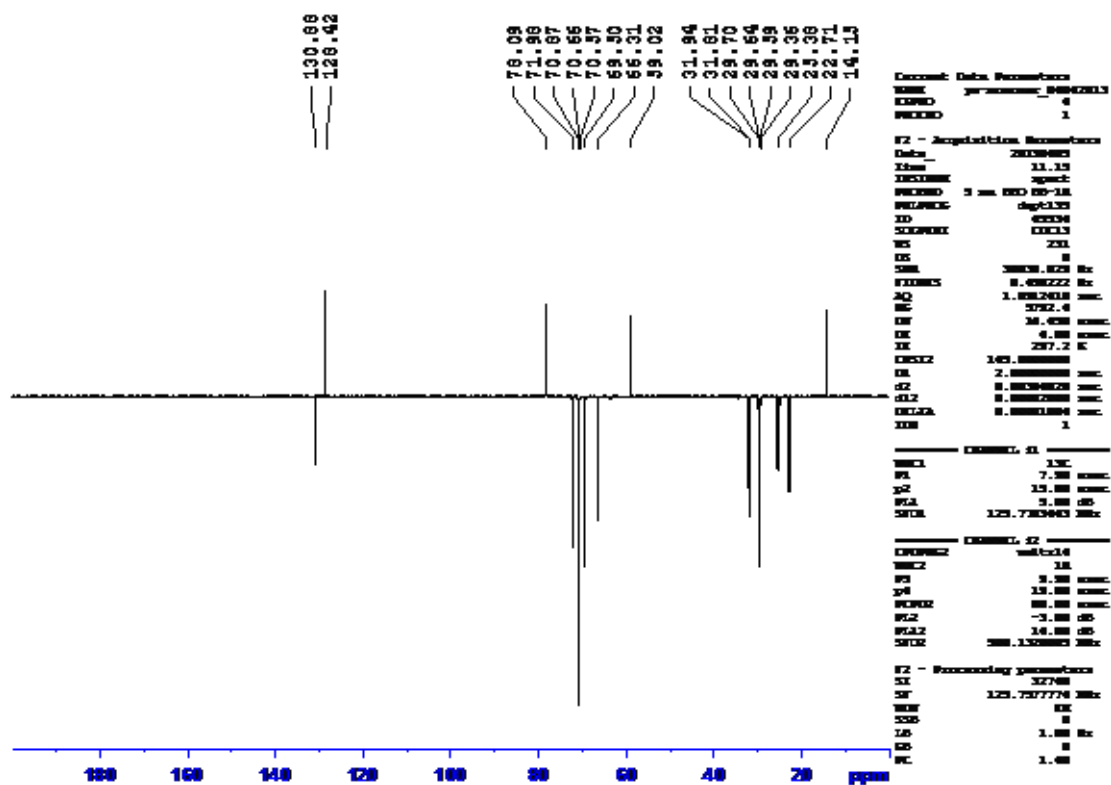

S4 DEPT NMR (in  $\text{CDCl}_3$ ,  $\delta$ ) of amphiphilic monomer 3.

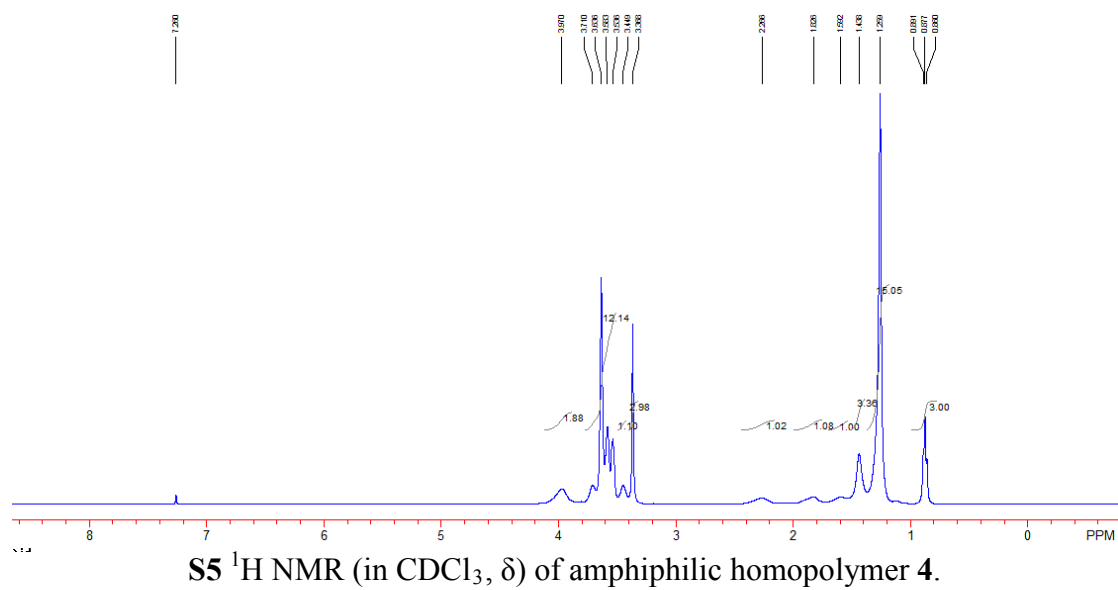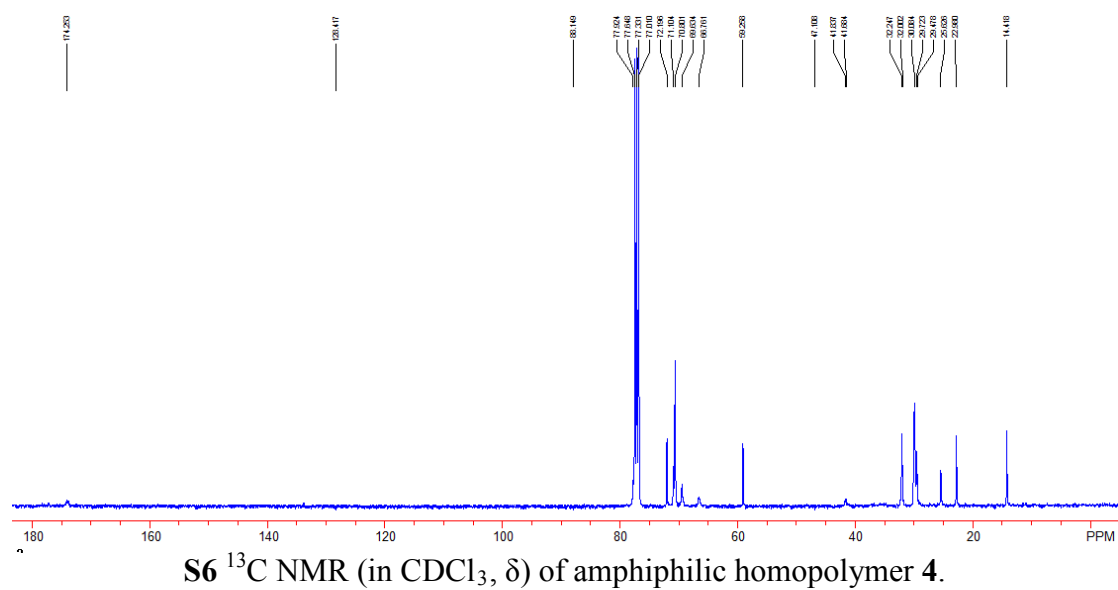

Supplement: c3py00916e.pdf [file c3py00916e.pdf]
